# Supplementary material
Source: Springer Nature journal article supplement (https://www.springermedizin.de/resource/supplementary/12889_2006_1021_MOESM12_ESM.pdf/9503152)
Supplement: MOESM12 [file 9503152]

**Week 43**

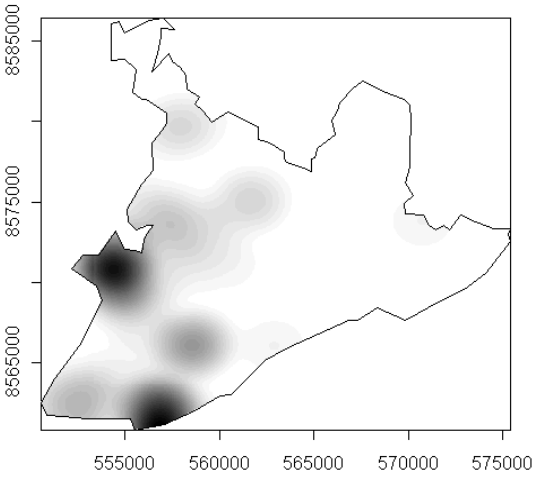

numbers of cases: 65

**Week 44**

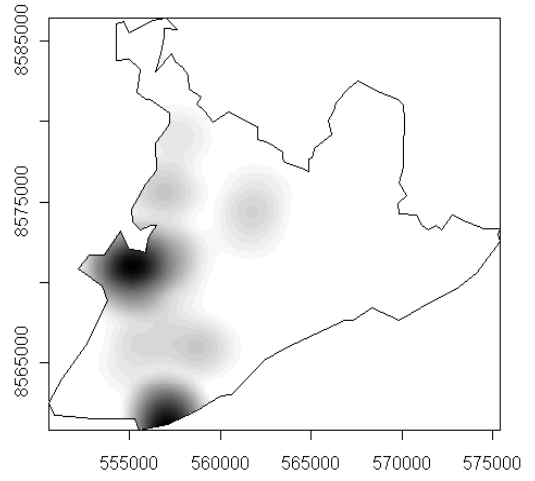

numbers of cases: 29

**Week 45**

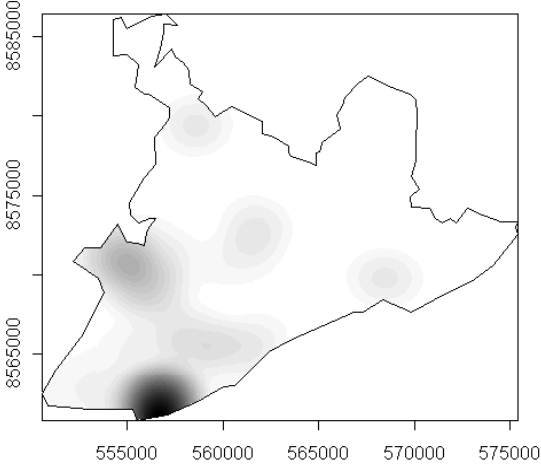

numbers of cases: 86

**Week 46**

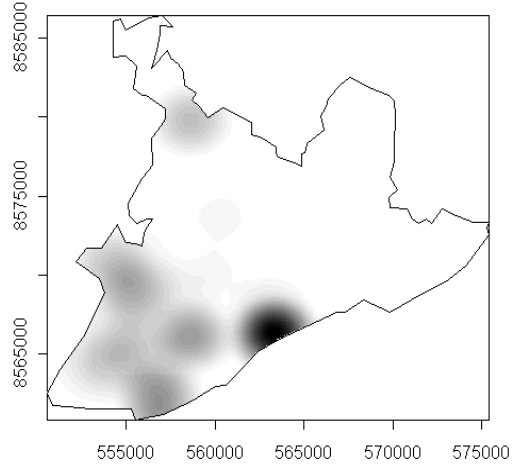

numbers of cases: 77

**Week 47**

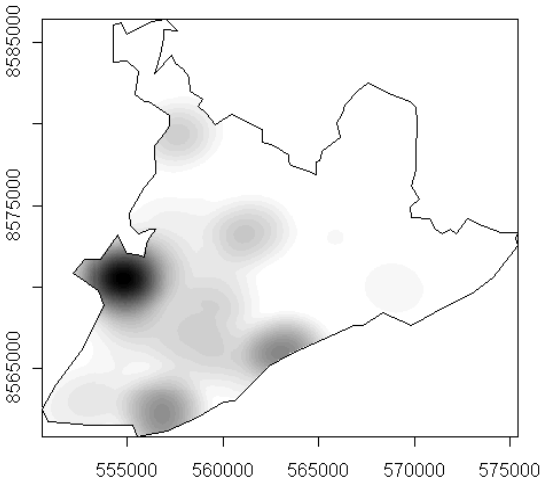

numbers of cases: 125

**Week 48**

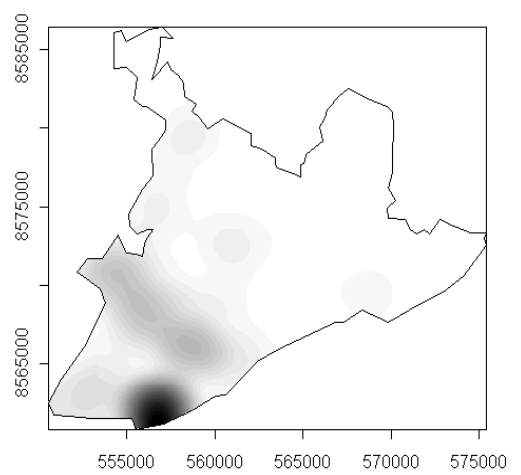

numbers of cases: 210
